# Supplementary material for: The Importance of Poly(ethylene glycol) and Lipid Structure in Targeted Gene Delivery to Lymph Nodes by Lipid Nanoparticles
Source: PubMed Central journal article supplement (PMC7695259; doi:10.3390/pharmaceutics12111068), 2020-11-09
Supplement: pharmaceutics-12-01068-s001.pdf [file pharmaceutics-12-01068-s001.pdf]

# Supplementary Materials: The Importance of Poly(ethylene glycol) and Lipid Structure in Targeted Gene Delivery to Lymph Nodes by Lipid Nanoparticles

Danijela Zukancic, Estelle J. A. Suys, Emily H. Pilkington, Azizah Algarni, Hareth Al-Wassiti and Nghia P. Truong

Table S1. Particle Characterisation data.

|                           | Size (nm) | PDI  | Z-Potential (mV) | EE %                      | Size (nm) | PDI  | Z-Potential (mV) | EE %  |  |
|---------------------------|-----------|------|------------------|---------------------------|-----------|------|------------------|-------|--|
| <b>1.5 PEG – DSPE LNP</b> |           |      |                  | <b>3.0 PEG – DSPE LNP</b> |           |      |                  |       |  |
| 1                         | 128.50    | 0.05 | -12.60           | 92.00                     | 87.89     | 0.09 | -11.80           | 86.00 |  |
|                           | 124.60    | 0.04 | -14.90           | 93.00                     | 85.42     | 0.09 | -14.50           | 88.00 |  |
|                           | 99.51     | 0.06 | -15.60           | 93.00                     | 85.08     | 0.07 | -13.90           | 86.00 |  |
| 2                         | 99.14     | 0.08 | -12.40           | 86.00                     | 88.20     | 0.08 | -12.00           | 87.00 |  |
|                           | 97.89     | 0.07 | -13.80           | 90.00                     | 84.76     | 0.10 | -14.10           | 85.00 |  |
|                           | 128.00    | 0.06 | -15.20           | 86.00                     | 84.80     | 0.07 | -16.50           | 85.00 |  |
| 3                         | 137.00    | 0.03 | -10.00           | 88.00                     | 83.00     | 0.13 | -16.00           | 85.00 |  |
|                           | 143.20    | 0.04 | -12.00           | 86.00                     | 81.59     | 0.16 | -14.00           | 87.00 |  |
|                           | 134.60    | 0.05 | -13.00           | 90.00                     | 81.00     | 0.16 | -13.00           | 86.00 |  |
| <b>1.5 Tween 80</b>       |           |      |                  | <b>3.0 Tween 80</b>       |           |      |                  |       |  |
| 1                         | 191.90    | 0.11 | -14.20           | 57.00                     | 152.20    | 0.07 | -7.50            | 55.00 |  |
|                           | 191.60    | 0.12 | -15.70           | 46.00                     | 150.20    | 0.09 | -7.60            | 49.00 |  |
|                           | 189.20    | 0.08 | -17.20           | 58.00                     | 148.10    | 0.07 | -7.70            | 50.00 |  |
| 2                         | 183.50    | 0.09 | -10.60           | 43.00                     | 167.80    | 0.06 | -9.00            | 49.00 |  |
|                           | 185.20    | 0.11 | -10.80           | 49.00                     | 163.80    | 0.14 | -11.00           | 55.00 |  |
|                           | 187.26    | 0.09 | -8.90            | 55.00                     | 160.30    | 0.10 | -9.00            | 55.00 |  |
| 3                         | 183.20    | 0.17 | -10.90           | 49.00                     | 165.40    | 0.15 | -15.00           | 63.00 |  |
|                           | 177.10    | 0.16 | -12.50           | 57.00                     | 162.30    | 0.14 | -15.00           | 63.00 |  |
|                           | 175.70    | 0.17 | -14.10           | 54.00                     | 162.20    | 0.16 | -14.00           | 62.00 |  |
| <b>1.5 Tween 20</b>       |           |      |                  | <b>3.0 Tween 20</b>       |           |      |                  |       |  |
| 1                         | 156.50    | 0.10 | -11.40           | 73.00                     | 151.40    | 0.13 | -7.68            | 42.00 |  |
|                           | 152.80    | 0.11 | -11.80           | 73.00                     | 146.70    | 0.12 | -11.20           | 42.00 |  |
|                           | 147.40    | 0.11 | -11.80           | 76.00                     | 145.60    | 0.13 | -11.10           | 43.00 |  |
| 2                         | 166.60    | 0.11 | -8.00            | 71.00                     | 140.90    | 0.18 | -13.70           | 53.00 |  |
|                           | 163.00    | 0.12 | -10.00           | 60.00                     | 136.10    | 0.17 | -13.00           | 52.00 |  |
|                           | 160.40    | 0.07 | -12.00           | 73.00                     | 132.00    | 0.16 | -12.00           | 52.00 |  |
| 3                         | 147.90    | 0.10 | -11.00           | 62.00                     | 170.80    | 0.14 | -9.00            | 52.00 |  |
|                           | 146.10    | 0.10 | -11.70           | 62.00                     | 168.80    | 0.09 | -7.00            | 52.00 |  |
|                           | 143.50    | 0.10 | -10.00           | 63.00                     | 169.90    | 0.08 | -12.00           | 53.00 |  |

Table S2. Stability during storage.

| <b>1.5% PEG-DSPE</b> |      | <b>3.0% PEG-DSPE</b> |      | <b>1.5% T80</b> |      | <b>3.0% T80</b> |      | <b>1.5% T20</b> |      | <b>3.0% T20</b> |      |
|----------------------|------|----------------------|------|-----------------|------|-----------------|------|-----------------|------|-----------------|------|
| Size (nm)            | PDI  | Size (nm)            | PDI  | Size (nm)       | PDI  | Size (nm)       | PDI  | Size (nm)       | PDI  | Size (nm)       | PDI  |
| Week 0               |      |                      |      |                 |      |                 |      |                 |      |                 |      |
| 113.30               | 0.05 | 88.20                | 0.08 | 183.50          | 0.09 | 165.40          | 0.15 | 156.50          | 0.10 | 151.40          | 0.13 |
| 110.20               | 0.07 | 84.76                | 0.10 | 185.20          | 0.11 | 162.30          | 0.14 | 152.80          | 0.11 | 146.70          | 0.12 |
| 109.70               | 0.07 | 84.80                | 0.07 | 187.26          | 0.09 | 162.20          | 0.16 | 147.40          | 0.11 | 145.60          | 0.13 |
| Week 1               |      |                      |      |                 |      |                 |      |                 |      |                 |      |
| 127.60               | 0.08 | 95.06                | 0.09 | 188.20          | 0.08 | 131.70          | 0.15 | 152.20          | 0.13 | 152.60          | 0.17 |
| 126.70               | 0.10 | 94.45                | 0.06 | 194.30          | 0.04 | 128.10          | 0.10 | 150.00          | 0.07 | 146.90          | 0.11 |
| 131.70               | 0.15 | 92.25                | 0.00 | 185.20          | 0.05 | 129.00          | 0.08 | 149.00          | 0.12 | 148.40          | 0.10 |
| Week 2               |      |                      |      |                 |      |                 |      |                 |      |                 |      |

|        |      |       |      |        |      |        |      |        |      |        |      |
|--------|------|-------|------|--------|------|--------|------|--------|------|--------|------|
| 136.10 | 0.02 | 93.54 | 0.11 | 196.00 | 0.10 | 126.60 | 0.15 | 154.20 | 0.15 | 152.00 | 0.13 |
| 132.70 | 0.01 | 94.16 | 0.12 | 193.40 | 0.05 | 127.70 | 0.14 | 157.90 | 0.01 | 152.50 | 0.16 |
| 128.10 | 0.08 | 93.22 | 0.07 | 188.70 | 0.05 | 128.00 | 0.04 | 155.60 | 0.06 | 148.80 | 0.13 |
| Week 3 |      |       |      |        |      |        |      |        |      |        |      |
| 130.30 | 0.06 | 92.08 | 0.17 | 195.00 | 0.15 | 123.40 | 0.11 | 163.40 | 0.03 | 151.40 | 0.06 |
| 127.60 | 0.14 | 92.28 | 0.07 | 193.20 | 0.05 | 120.50 | 0.17 | 162.50 | 0.11 | 145.60 | 0.09 |
| 128.00 | 0.01 | 90.73 | 0.07 | 196.10 | 0.06 | 119.00 | 0.16 | 149.40 | 0.17 | 146.90 | 0.11 |

Table S3. Serum stability.

| 1.5% PEG-DSPE |       | 3.0% PEG-DSPE |       | 1.5% Tween 80 |       | 3.0% Tween 80 |       | 1.5% Tween 20 |       | 3.0% Tween 20 |       |
|---------------|-------|---------------|-------|---------------|-------|---------------|-------|---------------|-------|---------------|-------|
| Size (nm)     | PDI   | Size (nm)     | PDI   | Size (nm)     | PDI   | Size (nm)     | PDI   | Size (nm)     | PDI   | Size (nm)     | PDI   |
| PBS           |       |               |       |               |       |               |       |               |       |               |       |
| 127.6         | 0.129 | 121.9         | 0.03  | 157.2         | 0.089 | 183.5         | 0.071 | 158.9         | 0.144 | 194           | 0.132 |
| 126.7         | 0.053 | 117.4         | 0.111 | 154           | 0.109 | 173.8         | 0.098 | 152.9         | 0.15  | 186.7         | 0.032 |
| 131.7         | 0.015 | 120.3         | 0.022 | 156.2         | 0.148 | 173.9         | 0.128 | 157.5         | 0.086 | 184           | 0.159 |
| Serum         |       |               |       |               |       |               |       |               |       |               |       |
| 141           | 0.202 | 95.48         | 0.259 | 118.6         | 0.332 | 148.9         | 0.238 | 129           | 0.292 | 161.2         | 0.277 |
| 139.9         | 0.208 | 93.84         | 0.279 | 120.9         | 0.301 | 147.8         | 0.194 | 119.7         | 0.288 | 168.4         | 0.233 |
| 137.8         | 0.235 | 94.76         | 0.265 | 117.3         | 0.308 | 147           | 0.261 | 122.7         | 0.309 | 159.1         | 0.272 |

Table S4. Plate Reader In-vivo data represented as RLU/mg tissue.

| Tissue | 1.5% PEG-DSPE |           |          | 3.0% PEG-DSPE |           |          |
|--------|---------------|-----------|----------|---------------|-----------|----------|
|        | D-LN          | 17602.90  | 2222.20  | 23666.70      | 727.30    | 208.70   |
| ND-LN  | 800.00        | 8631.60   | 666.70   | 363.60        | 208.70    | 80.80    |
| RM     | 80858.70      | 112991.50 | 68333.30 | 4242.40       | 4660.90   | 3692.30  |
| LV     | 1431.10       | 2222.20   | 3666.70  | 4000.00       | 695.70    | 1679.00  |
| SP     | 2432.90       | 3760.70   | 6666.70  | 1212.10       | 139.10    | 80.80    |
| KD     | 13738.80      | 1709.40   | 5000.00  | 727.30        | 208.70    | 565.70   |
| HT     | 1001.80       | 1025.60   | 1333.30  | 484.80        | 69.60     | 80.80    |
| Tissue | 1.5% Tween 80 |           |          | 3.0% Tween 80 |           |          |
|        | D-LN          | 17066.70  | 13377.80 | 4837.20       | 10917.60  | 14792.50 |
| ND-LN  | 1292.90       | 6545.50   | 434.10   | 738.50        | 6339.60   | 1582.40  |
| RM     | 12307.70      | 11151.50  | 2170.50  | 22754.90      | 26264.20  | 703.30   |
| LV     | 4007.20       | 5090.90   | 1054.30  | 2289.80       | 13584.90  | 1582.40  |
| SP     | 17173.50      | 19151.50  | 8682.20  | 13023.30      | 54037.70  | 28044.00 |
| KD     | 6583.20       | 16000.00  | 6387.60  | 3005.40       | 35320.80  | 3428.60  |
| HT     | 715.60        | 1454.50   | 310.10   | 715.60        | 3018.90   | 87.90    |
| Tissue | 1.5% Tween 20 |           |          | 3.0% Tween 20 |           |          |
|        | D-LN          | 23619.00  | 3428.60  | 11105.90      | 137481.50 | 44952.40 |
| ND-LN  | 3428.60       | 12800.00  | 847.10   | 2469.10       | 1238.10   | 1333.30  |
| RM     | 51809.50      | 29028.60  | 5364.70  | 1185.20       | 2952.40   | 285.70   |
| LV     | 2285.70       | 2285.70   | 658.80   | 691.40        | 952.40    | 666.70   |
| SP     | 4571.40       | 25371.40  | 9129.40  | 3851.90       | 12285.70  | 2666.70  |
| KD     | 13714.30      | 11885.70  | 1317.60  | 1975.30       | 10571.40  | 3904.80  |
| HT     | 1523.80       | 457.10    | 94.10    | 493.80        | 666.70    | 285.70   |

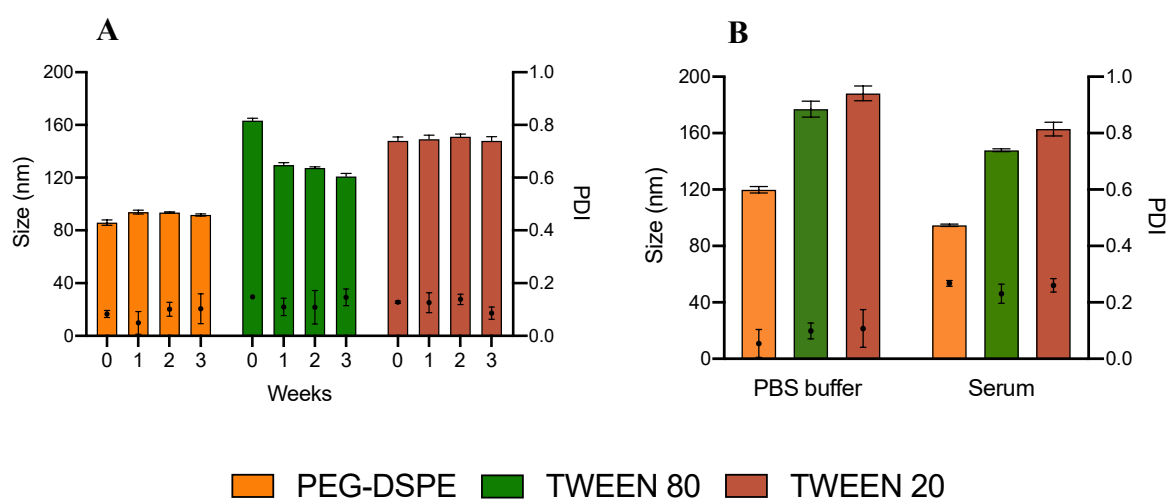

**Figure S1.** Stability. (A) Fridge stability for 1.5% LNP. (B) Serum stability for 1.5% LNP.

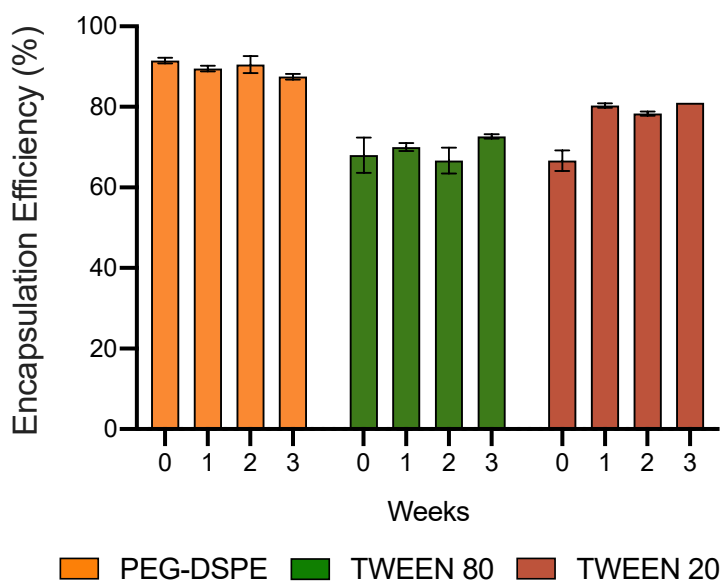

**Figure S2.** Stability (DNA leakage).

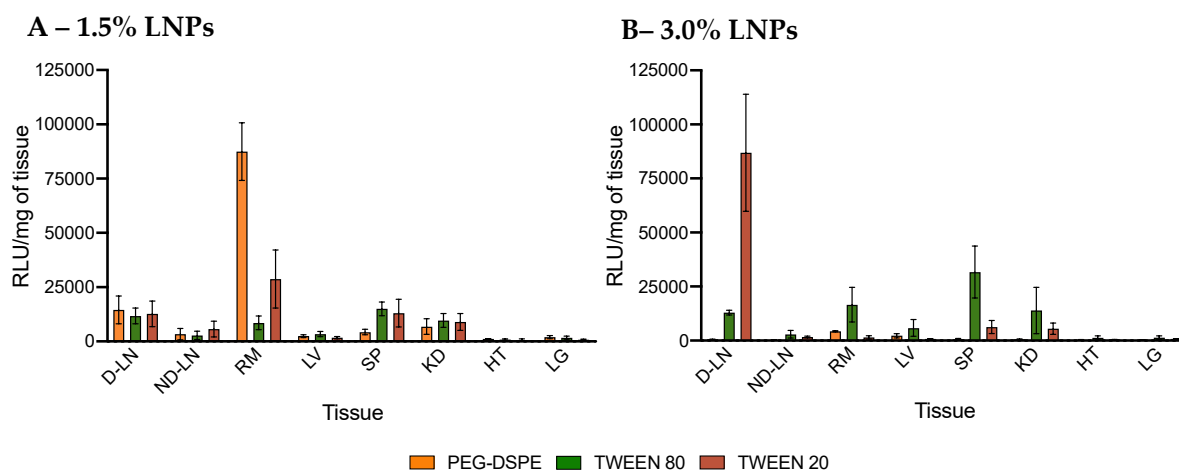

**Figure S3.** Plate Reader In-vivo data represented as (RLU/mg tissue) for all samples: (A) 1.5% and (B) 3%

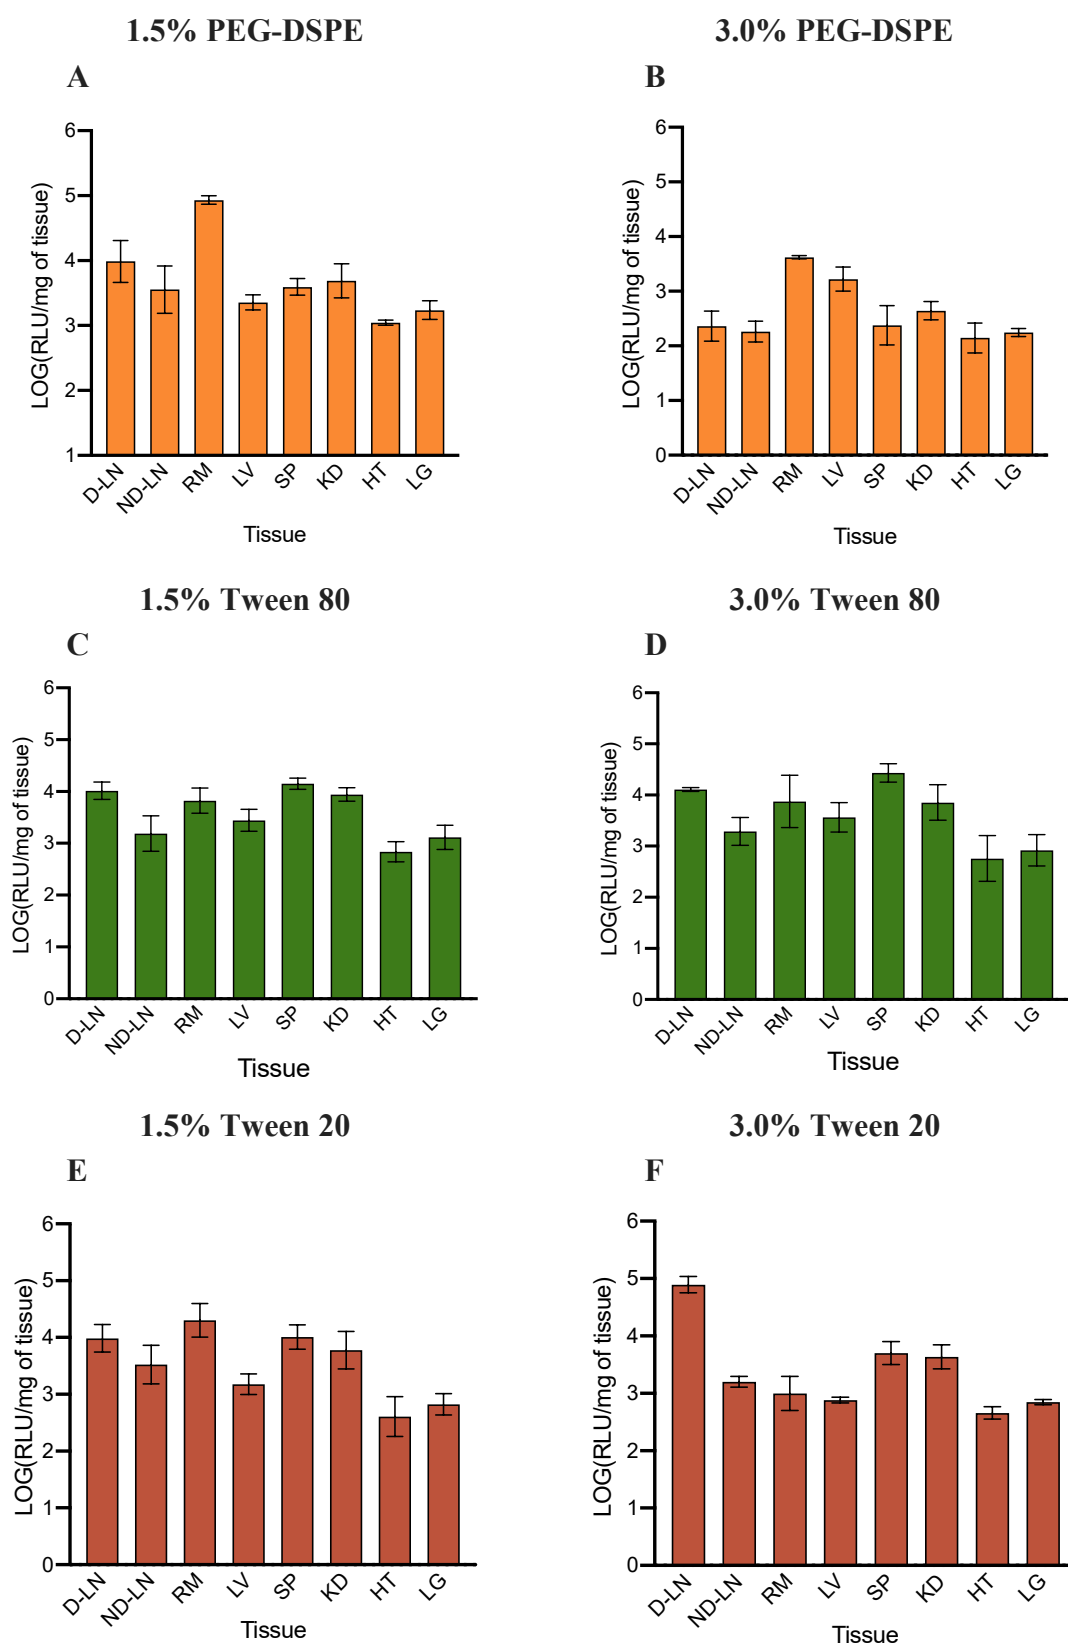

**Figure 4S.** Plate Reader In-vivo data represented as log(RLU/mg tissue): (A) 1.5% PEG-DSPE, (B) 3% PEG-DSPE, (C) 1.5% Tween 80, (D) 3% Tween 80, (E) 1.5% Tween 20, and (F) 3% Tween 20.

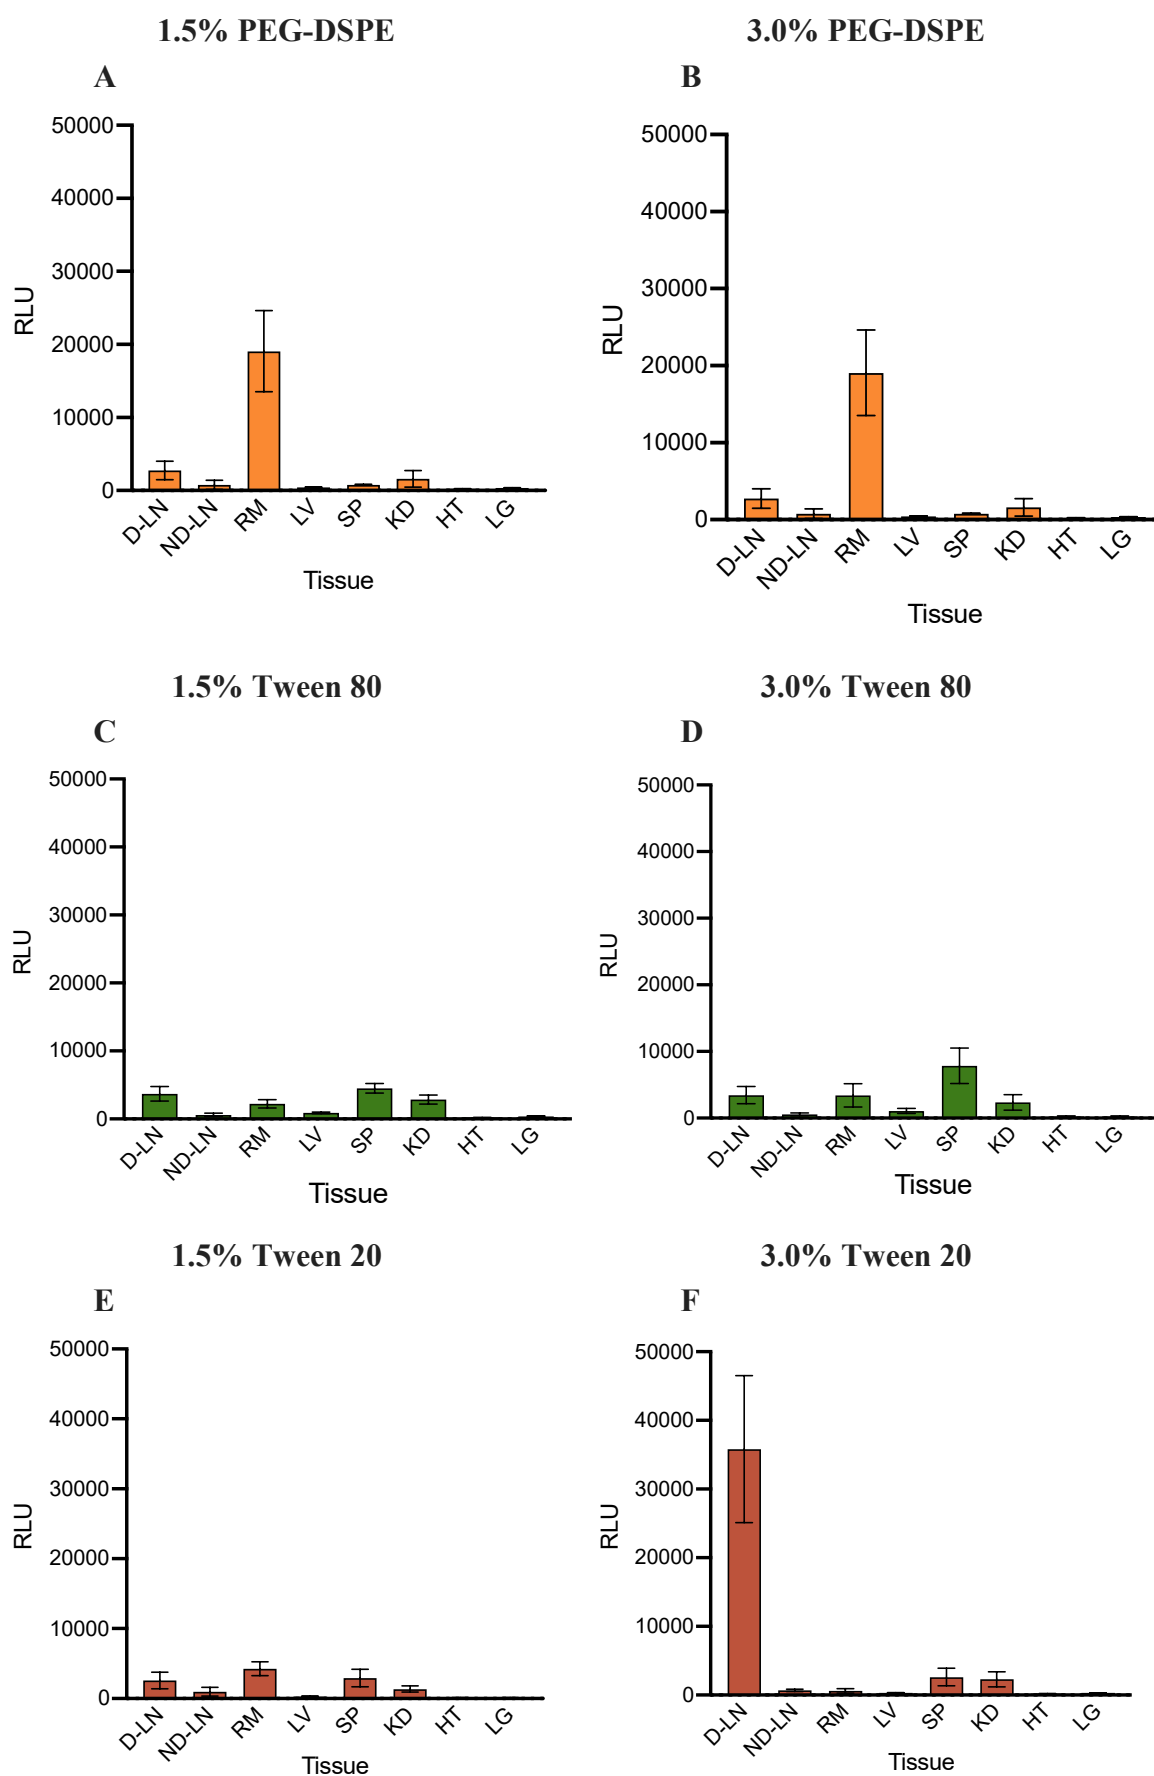

**Figure S5.** Plate Reader In-vivo data represented as RLU: (A) 1.5% PEG-DSPE, (B) 3% PEG-DSPE, (C) 1.5% Tween 80, (D) 3% Tween 80, (E) 1.5% Tween 20, and (F) 3% Tween 20.

**A – 1.5% Tween 80**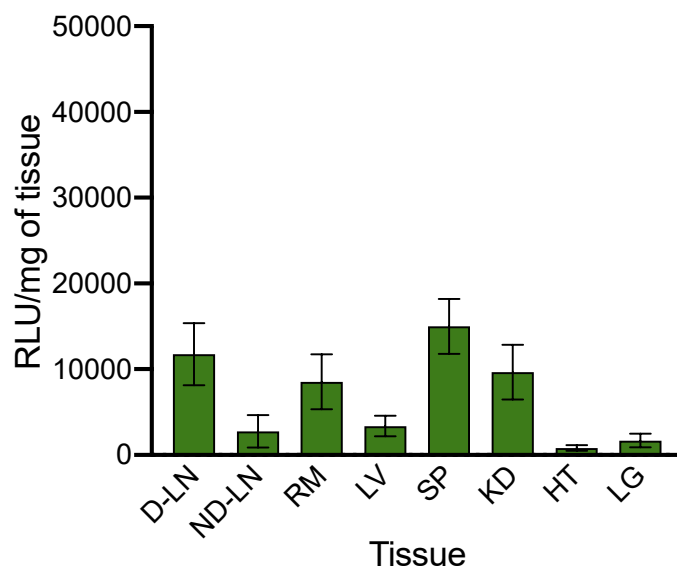**B– 3.0% Tween 80**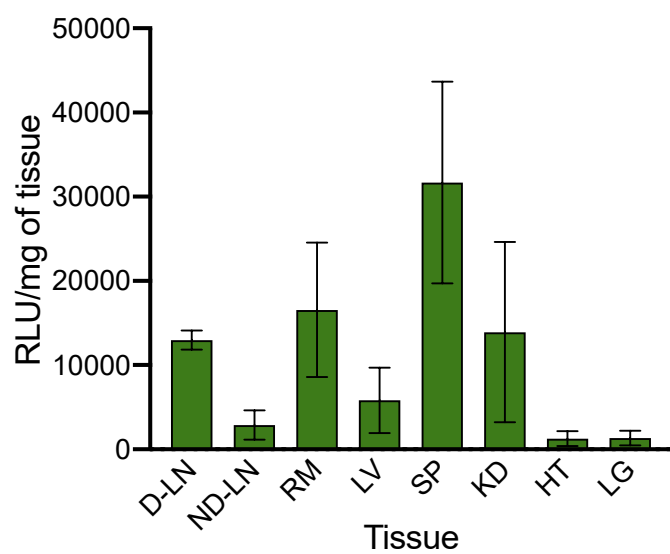

**Figure S6.** Plate Reader In-vivo data represented as (RLU/mg tissue) for Tween 80 (different scale to Figure 6): (A) 1.5% Tween 80 and (B) 3% Tween 80.
